# Supplementary material for: A constructive approach for discovering new drug leads: Using a kernel methodology for the inverse-QSAR problem
Source: PubMed Central journal article supplement (PMC2816860; doi:10.1186/1758-2946-1-4), 2009-04-28
Supplement: 13321_2009_4_MOESM3_ESM.pdf [file 13321_2009_4_MOESM3_ESM.pdf]

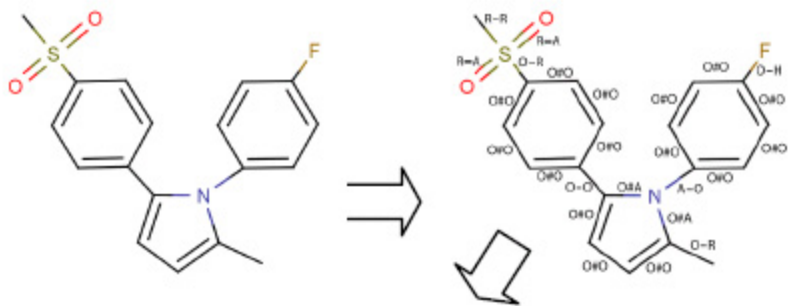

R-R R=A R=A O-R O#O O#O O#O O#O O#O O#O O-O  
 O#A O#A O-R O#O O#O O#O A-O O#O O#O O#O O#O  
 O#O O#O O-H

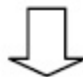

R-R R=A O-R O#O O-O O#A A-O O-H  
 1 2 2 15 1 2 1 1
