# Supplementary material for: A constructive approach for discovering new drug leads: Using a kernel methodology for the inverse-QSAR problem
Source: PubMed Central journal article supplement (PMC2816860; doi:10.1186/1758-2946-1-4), 2009-04-28

Feature space

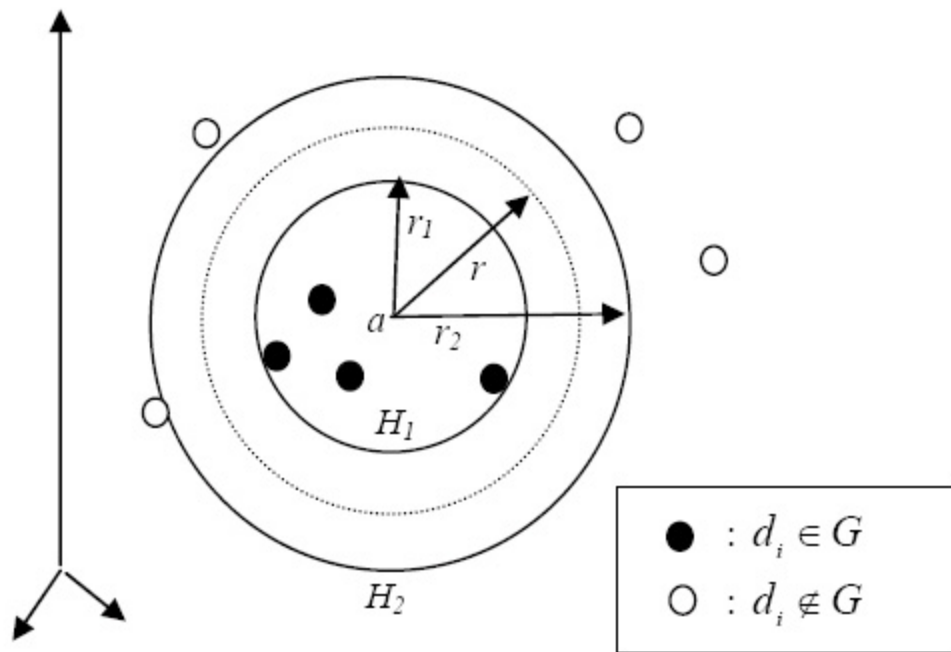

Supplement: 13321_2009_4_MOESM6_ESM.pdf [file 13321_2009_4_MOESM6_ESM.pdf]
