# Supplementary material for: A constructive approach for discovering new drug leads: Using a kernel methodology for the inverse-QSAR problem
Source: PubMed Central journal article supplement (PMC2816860; doi:10.1186/1758-2946-1-4), 2009-04-28
Supplement: 13321_2009_4_MOESM8_ESM.pdf [file 13321_2009_4_MOESM8_ESM.pdf]

*Input Space*

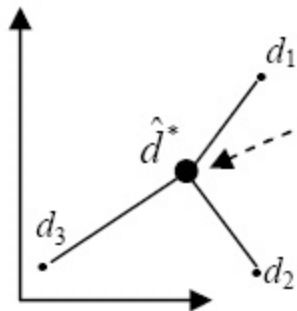

*Feature Space*

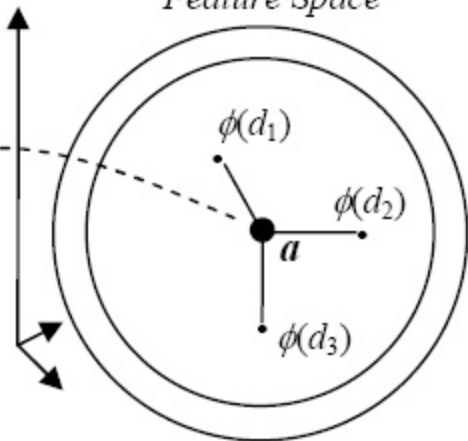

$\hat{d}^*$

$d_1$

$d_3$

$d_2$

$\phi(d_1)$

$\phi(d_2)$

$\phi(d_3)$

$a$
