# Supplementary material for: A constructive approach for discovering new drug leads: Using a kernel methodology for the inverse-QSAR problem
Source: PubMed Central journal article supplement (PMC2816860; doi:10.1186/1758-2946-1-4), 2009-04-28
Supplement: 13321_2009_4_MOESM9_ESM.pdf [file 13321_2009_4_MOESM9_ESM.pdf]

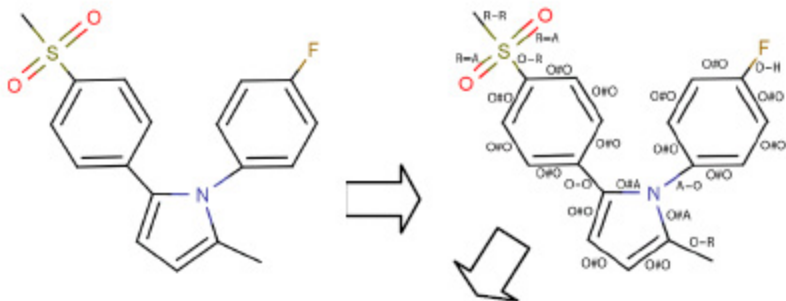

|                       |                       |
|-----------------------|-----------------------|
| 0#0#0#0#A-R           | 0#0#0#0#A-0#0#0#0#0#0 |
| 0#0#0#0#A-0#0#0#0#0#0 | 0#0#0#0#0#0-R         |
| R=A                   | R-R                   |
| R=A                   | 0#0#0#0#0#0-H         |

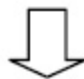

|                       |   |
|-----------------------|---|
| 0#0#0#0#A-R           | 1 |
| 0#0#0#0#A-0#0#0#0#0#0 | 2 |
| 0#0#0#0#0#0-R         | 1 |
| R=A                   | 2 |
| R-R                   | 1 |
| 0#0#0#0#0#0-H         | 1 |
