# Supplementary material for: A constructive approach for discovering new drug leads: Using a kernel methodology for the inverse-QSAR problem
Source: PubMed Central journal article supplement (PMC2816860; doi:10.1186/1758-2946-1-4), 2009-04-28
Supplement: 13321_2009_4_MOESM13_ESM.pdf [file 13321_2009_4_MOESM13_ESM.pdf]

R->A->R->O->OA->O->H->O->R->R->R->A->R->OA->O->OA->R  
R->A->R->O->OA->O->H->O->R->R->R->OA->O->OA->R->A->R  
R->A->R->O->OA->O->H->O->OA->R->A->R->OA->O->R->R->R  
R->A->R->O->OA->O->H->O->OA->R->A->R->R->OA->O->R->R  
R->A->R->O->OA->O->H->O->OA->R->A->R->R->R->OA->O->R  
R->A->R->O->OA->O->H->O->OA->R->OA->O->R->A->R->R->R  
R->A->R->O->OA->O->H->O->OA->R->OA->O->R->R->A->R->R  
R->A->R->O->OA->O->H->O->OA->R->OA->O->R->R->R->A->R  
R->A->R->O->OA->O->H->O->OA->R->R->A->R->OA->O->R->R  
R->A->R->O->OA->O->H->O->OA->R->R->A->R->R->OA->O->R

\*
