# Supplementary material for: A constructive approach for discovering new drug leads: Using a kernel methodology for the inverse-QSAR problem
Source: PubMed Central journal article supplement (PMC2816860; doi:10.1186/1758-2946-1-4), 2009-04-28
Supplement: 13321_2009_4_MOESM17_ESM.pdf [file 13321_2009_4_MOESM17_ESM.pdf]

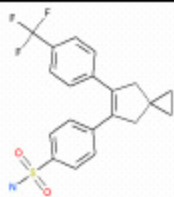

Activity = 9.0  
(mol\_id = 318)

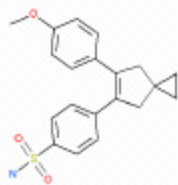

Activity = 9.0  
(mol\_id = 314)

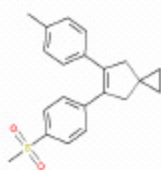

Activity = 8.82  
(mol\_id = 312)

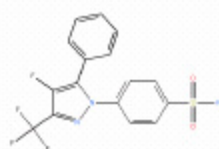

Activity = 8.77  
(mol\_id = 274)

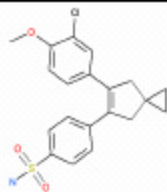

Activity = 8.7  
(mol\_id = 308)

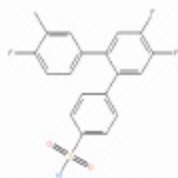

Activity = 8.7  
(mol\_id = 200)

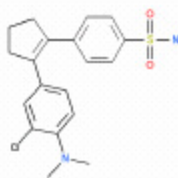

Activity = 8.7  
(mol\_id = 181)

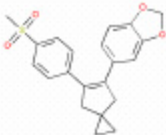

Activity = 8.6  
(mol\_id = 319)

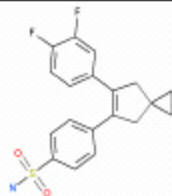

Activity = 8.52  
(mol\_id = 321)

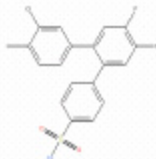

Activity = 8.52  
(mol\_id = 206)
