# Supplementary material for: A constructive approach for discovering new drug leads: Using a kernel methodology for the inverse-QSAR problem
Source: PubMed Central journal article supplement (PMC2816860; doi:10.1186/1758-2946-1-4), 2009-04-28

a)

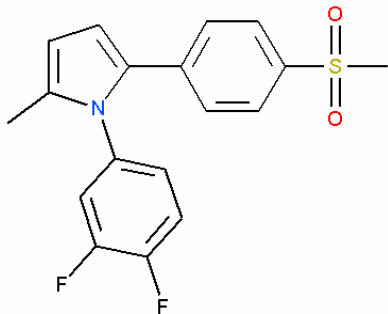

b)

|                   |   |
|-------------------|---|
| O#O#O#A-R         | 1 |
| O#O#O#A-O#O#O#O#O | 2 |
| O#O#O#O#O-R       | 1 |
| R=A               | 2 |
| R-R               | 1 |
| O#O#O#O#O-H       | 2 |

c)

|                   |   |
|-------------------|---|
| O#O#O#A-R         | 1 |
| O#O#O#A-O#O#O#O#O | 2 |
| O#O#O#O#O-R       | 1 |
| R=A               | 2 |
| R-R               | 1 |
| O#O#O#O#O-H       | 2 |

d)

H->O->H->O->OA->R->OA->O->R->A->R->A->R->R->R->O->OA->O->H

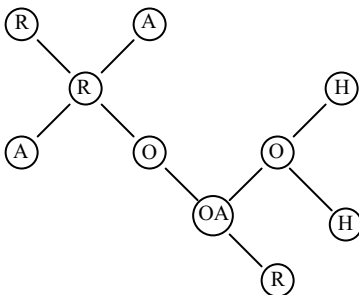

Supplement: 13321_2009_4_MOESM18_ESM.pdf [file 13321_2009_4_MOESM18_ESM.pdf]
