# Supplementary material for: A constructive approach for discovering new drug leads: Using a kernel methodology for the inverse-QSAR problem
Source: PubMed Central journal article supplement (PMC2816860; doi:10.1186/1758-2946-1-4), 2009-04-28
Supplement: 13321_2009_4_MOESM22_ESM.pdf [file 13321_2009_4_MOESM22_ESM.pdf]

ACE

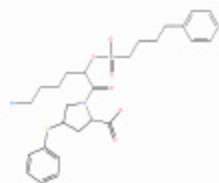

Given Activity=9.11  
Predicted Activity=9.15

Ache

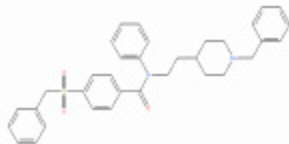

Given Activity=9.22  
Predicted Activity=9.46

BZR

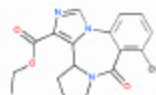

Given Activity=8.77  
Predicted Activity=8.40

COX2

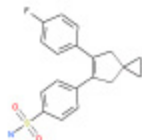

Given Activity=8.52  
Predicted Activity=8.21

DHFR

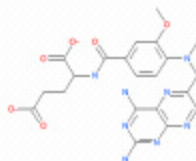

Given Activity=8.96  
Predicted Activity=8.38

GPB

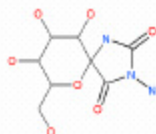

Given Activity=6.8  
Predicted Activity=5.24

THER

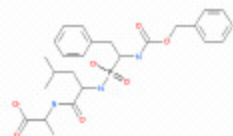

Given Activity=10.17  
Predicted Activity=6.77

THR

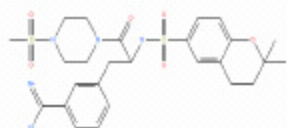

Given Activity=8.13  
Predicted Activity=7.03
