# Supplementary material for: A constructive approach for discovering new drug leads: Using a kernel methodology for the inverse-QSAR problem
Source: J Cheminform. 2009 Apr 28;1:4. doi: 10.1186/1758-2946-1-4 (PMC2816860; doi:10.1186/1758-2946-1-4)
Supplement: Supplementary file 19 — Authors’ original file for figure 19 [file 13321_2009_4_MOESM19_ESM.pdf]

R=A   R<sup>\*</sup>-O#O#O#O#O#O#O   R-A   R-O#O#O#O#O#O#O   O#O#O#O#O#O#O-H

2

2

1

1

1
